# Supplementary material
Source: publisher figshare collection journal article supplement (https://karger.figshare.com/articles/dataset/_/5127415)
Supplement: Supplementary file 1 [file 1]

|                                                                                            |                                                              |                                                                |
|--------------------------------------------------------------------------------------------|--------------------------------------------------------------|----------------------------------------------------------------|
| <div style="border-left: 2px solid black; height: 100px; margin-left: 5px;"></div>         | 1a                                                           | ---TGCAAGGAGGTCAAGGT---TCAAGGGTTCCAACCCCATCTCTAAACC-AACCCACTA  |
|                                                                                            | 2a                                                           | -----TGGT---CCAAGGGTTC-AACCCCATCTCTAAACC-AATCCACTA             |
|                                                                                            | 2d                                                           | TGCCGCAAGGAGGTCAAGGTGGTCCAAGGGTTCAAGCCCCATCTCTAAACC-AACCCACTA  |
|                                                                                            | 1f                                                           | TGCCGCAAGGAGGTCAAGGAT---CCAAGGGTTCAAACCACATCTCTAAACC-AATCCACTA |
|                                                                                            | 2g                                                           | TGCCGCAAGGAGGCCAGGGT---CCAAGGGTTCAAGCC-CATCTATAAAACC-AATCCACTA |
|                                                                                            | 1d                                                           | TGCCACAGGAGGT--GGGT---CCAAGGGTTCAAATCCCAGCTCTCTAAACT-AACCCACTA |
|                                                                                            | 1b                                                           | TGCCGCAAGGAGGTCAAGGGT---CCAAGGGATCAAATCCCAGCTCTAAACC-AACCCACTA |
| <div style="background-color: black; width: 10px; height: 100px; margin-left: 5px;"></div> | 2c                                                           | TTCCGCAAGGAGGTCAAGGGT---CCGAGGGTTCAAATCCCAGCTCTAAACC-AATCCACTA |
|                                                                                            | 1c                                                           | TGCCGCACTAGGTC-----AGGGTTTAAATCCCAGATCTCTAAACC-AATTCACTA       |
|                                                                                            |                                                              |                                                                |
|                                                                                            | 1e                                                           | TGCCAAACGAGGAGAGATC---GCATG-GTTCAAATCCCAGCTCTAAATC-AATCCACTA   |
|                                                                                            | 2f                                                           | TGCCACAGGAGGTGAGGGC---TGATG-GTTCAAATCCCAGCTCTAAATTTAATTCACTA   |
|                                                                                            | 2b                                                           | TGCCACAGGAGGTGAGGGC---CCATGAGTTCAAATCCCAGCTCTAACCC-AATCCACTA   |
|                                                                                            | 2e                                                           | TGCCACAGGAGGTGAGGGC---CCATGAGATCAAACCCCATCTCTAAACC-AACCCACTA   |
| 1g                                                                                         | TGTCGCAGGAGGTGAGGGC---CCATG-ATTCAAATCC-AGCTCTAAACC-AATCCACTA |                                                                |

\*   \*   \*   \*   \*   \*   \*   \*   \*   \*
