# Supplementary material
Source: publisher figshare collection journal article supplement (https://karger.figshare.com/articles/dataset/_/5127415)
Supplement: Supplementary file 2 [file 1]

|                 |   |                                                                                                                                            |
|-----------------|---|--------------------------------------------------------------------------------------------------------------------------------------------|
| NmH10 subrepeat | b | TTGTGGAAAAA-CACAGTCTCTA-CGACTGACAGATCATACAAAACAGCCATGCTGGCAGTCTCAACCCCATACAAAA-CAGCAAGCT                                                   |
| NmH14 subrepeat | b | TTGTGGAAAAA-CACAGTCTCTA-CGACTGACAGATCATACAAAACAGCCATTCTGGCAGTCTCAACCCCATACAAAA-CAGCAAGCT                                                   |
| NmH3 subrepeat  | b | TGGTGGAAAAAACACAGTCTCTA-CGACTGACAGATCATACAAAACAGCCATTCTGGCAGTCTCAACCCCATACAAAAACAGCAAGCT                                                   |
| NmH4 subrepeat  | b | TGGTGGAAAAAACACAGTCTCTA-CGACTGACAGATCATACAAAACAGCCATTCTGGCAGTCTCAACCCCATACAAAAACAGCAAGCT                                                   |
| NmH18 subrepeat | b | TGGTGGAAAAA-CACAGTCTCTA-CGACTGACAGATCATACAAAACAGCCATTCTGGCAGTCTTAACCCCATACAAAA-CAGCAAGCT                                                   |
| NmH2 subrepeat  | b | TGGTAGAAAAA-CACAGTCTCTA-CGACTGACAGATCATACAAAACAGCCATTGTGGCAGCTCAACCCCATACAAAA-CAGCAAGCT                                                    |
| NmH17 subrepeat | b | GGACGGAAAAA-CACAGTCTCTAACGACTGACAGATCATGCAAAACAGCCATTCTGGCAGCTCAACCCCATACAAAA-CAGCAAGCT                                                    |
|                 |   |                                                                                                                                            |
| NmH10 subrepeat | a | TGGTGGAAAAA-TACAGTCTCTAACGACTGAAAGACTGTGCAAAATAACCATTCTGGCAGCATCAAGCACGTACAGTA-CAGCCAGAT                                                   |
| NmH18 subrepeat | a | TGGTGGAAAAA-TACAGTCTCTAACGACTGAAAGACTGTGCAAAATAACCATTCTGGCAGCATCAAGCACGTACAGTA-CAGCCAGA-                                                   |
| NmH14 subrepeat | a | TGGTGGAAAAA-TACAGTCTCTAACGACTGAAAGACTGTGCAAAATAGCCATTCTGGCAGCATCAAGCACGTACAGTA-CAGCCAGAT                                                   |
| NmH2 subrepeat  | a | TGGTGGAAAAA-CACAGTCTCTAATGACTGAAAGACTGTACAAATACCCATTCTGGCAGCATCAAGCACGTACAGTA-TAGCCAGAT                                                    |
| NmH17 subrepeat | a | TGGTGGAAAAA-TACAGTCTCTAACGACTGAAAGACTGTACAAACAGCCATTCTGGCAGCATCAAGCACGTACAGTA-CAGCCAGAT                                                    |
| NmH3 subrepeat  | a | TGGTGGAAAAA-TACAGTCTCTA-CGACTGA-----TGTACAAATACCCATTCTGGCAGCATCAACCACGTACAGTA-CAGCCAGAT                                                    |
| NmH4 subrepeat  | a | TGGTGGAAAAA-TACAGTCTCTA-CGACTGA-----TGTACAAATACCCATTCTGGCAGCATCAACCACGTACAGTA-CAGCCAGAT                                                    |
|                 |   | *****      *****      *****                      *    *****    *    *****      *****      *    *    *    *    *****      *      ****    ** |
